# Supplementary material for: Systematic Review of Tumor Segmentation Strategies for Bone Metastases
Source: MDPI journal article supplement (doi:10.3390/cancers15061750), 2023-03-14
Supplement: s1 [file s1]

|   | Reference                      | Technique | Primary Cancer                                | Image Modality | Dataset                                                                                                                                         | Application                                                                      | Evaluation Metric                                     | Results                                                                                                                                                                                                                                                                         | Suitable for Clinical Use or Not                                                                                                                                                         | Open-Source Code Availability |
|---|--------------------------------|-----------|-----------------------------------------------|----------------|-------------------------------------------------------------------------------------------------------------------------------------------------|----------------------------------------------------------------------------------|-------------------------------------------------------|---------------------------------------------------------------------------------------------------------------------------------------------------------------------------------------------------------------------------------------------------------------------------------|------------------------------------------------------------------------------------------------------------------------------------------------------------------------------------------|-------------------------------|
|   | Deep Learning                  |           |                                               |                |                                                                                                                                                 |                                                                                  |                                                       |                                                                                                                                                                                                                                                                                 |                                                                                                                                                                                          |                               |
| 1 | Papandrianos, N., et al., 2020 | CNN       | Prostate                                      | Bone Scans     | 586 bone scan images; 368 bone scans of male patients with bone metastasis; 218 bone scans of male patients without bone metastasis             | Classification of the bone metastasis                                            | PA<br>Loss<br>Precision<br>Recall<br>F1<br>TPR<br>TNR | <b>Malignant disease class:</b><br>PA: 97.38<br>Loss: 0.087<br>Precision: 0.987<br>Recall: 0.973<br>F1: 0.98<br>TPR: 0.984<br>TNR: 0.95<br><br><b>Healthy disease class:</b><br>PA: 97.38<br>Loss:<br>Precision: 0.947<br>Recall: 0.975<br>F1: 0.96<br>TPR: 0.945<br>TNR: 0.987 | Not addressed                                                                                                                                                                            | No                            |
| 2 | Chmelik, J., et al., 2018      | CNN       | Metastases / Not specified the primary cancer | CT             | 31 patients (13 females, 18 males; mean age 70.8 years; range 46–86 years) involving 626 vertebrae (100 cervical, 371 thoracic, and 155 lumbar) | Segmentation and classification of difficult to define metastatic spinal lesions | TPR<br>TNR<br>AUC<br>YI                               | <b>Lytic:</b><br>TPR=0.71<br>TNR=0.88<br>AUC=0.8<br>YI=0.59<br><br><b>Sclerotic:</b><br>TPR=0.74<br>TNR=0.82<br>AUC=0.78<br>YI=0.56                                                                                                                                             | Yes [higher TPR in comparison to the inter-expert agreement. The number of False Positive (FP) detections is still within satisfactory limits (according to the cooperating clinicians)] | No                            |

|   |                                      |                                                                                                      |                                              |            |                                            |                                     |                                        |                                                                                                          |                                                                |                                                                                   |
|---|--------------------------------------|------------------------------------------------------------------------------------------------------|----------------------------------------------|------------|--------------------------------------------|-------------------------------------|----------------------------------------|----------------------------------------------------------------------------------------------------------|----------------------------------------------------------------|-----------------------------------------------------------------------------------|
| 3 | Guo, Y., et al.,2022                 | CNN with residual connection and hybrid attention mechanism                                          | Lung                                         | Bone Scans | 506 patients; 1011 images                  | Metastases Detection                | PA<br>Precision<br>Recall<br>F1<br>AUC | PA: 0.7782<br>Precision: 0.7799<br>Recall: 0.7823<br>F1: 0.7764<br>AUC: 0.8364                           | Not addressed                                                  | No                                                                                |
| 4 | Han, S., J.S. Oh, and J.J. Lee, 2022 | CNN (whole body based (WB) and tandem architectures integrating whole body and local patches (GLUE)) | Prostate                                     | Bone Scans | 5342 patients; 9113 bone scans             | Metastases Detection                | PA<br>AUC                              | <b>GLUE:</b><br>PA: 0.9<br>AUC: 0.936–0.955<br><br><b>WB:</b><br>PA: 0.889<br>AUC: 0.933–0.957, P > 0.05 | Potential; doesn't guarantee suitability for clinical practice | No                                                                                |
| 5 | Li, T., et al. 2022                  | CNN                                                                                                  | Lung                                         | Bone Scans | 2185 patients                              | Metastases Detection                | PA<br>Precision<br>Recall<br>F1        | PA: 0.7392<br>Precision: 0.7592<br>Recall: 0.7242<br>F1: 0.7292                                          | Not addressed                                                  | Code available via collaboration agreement by contacting the corresponding author |
| 6 | Lin, Q., et al., 2020                | U-Net and Mask R-CNN                                                                                 | Metastases / Not Specified the primary tumor | CT         | 76 patients; Age:43 - 87 years             | Segmentation of metastasis hotspots | PA<br>CPA<br>Recall<br>IoU             | PA: 0.9920<br>CPA: 0.7721<br>Recall: 0.6788<br>IoU: 0.6103                                               | Not addressed                                                  | No                                                                                |
| 7 | Moreau, N., et al., 2022             | nn-Unet (2 models for                                                                                | Breast                                       | PET/CT     | 60 patients; Training: 60 baseline and 104 | Metastases Segmentation             | DSC<br>Recall<br>Precision             | <b>Baseline:</b><br>Mean DSC: 0.66<br>Global DSC: 0.73                                                   | Not addressed                                                  | No                                                                                |

|    |                                                            |                                                           |                                              |            |                                                                                      |                                   |                            |                                                                                                                                                                                           |               |    |
|----|------------------------------------------------------------|-----------------------------------------------------------|----------------------------------------------|------------|--------------------------------------------------------------------------------------|-----------------------------------|----------------------------|-------------------------------------------------------------------------------------------------------------------------------------------------------------------------------------------|---------------|----|
|    |                                                            | baseline and follow-up)                                   |                                              |            | follow-up PET/CT images; Evaluation: 10 patients with one baseline and one follow-up |                                   |                            | Recall: 0.72<br>Precision: 0.87<br><br><b>Follow-up:</b><br>Mean DSC: 0.58<br>Global DSC: 0.64<br>Recall: 0.63<br>Precision: 0.78                                                         |               |    |
| 8  | Moreau, N., et al., 2020                                   | nn-Unet (2 models for bone and bone lesion segmentation ) | Breast                                       | PET/CT     | 24 patients                                                                          | Bone and Bone Lesion Segmentation | DSC<br>Recall<br>Precision | <b>Bone:</b><br>Mean DSC: 0.58<br>Global DSC: 0.59<br>Recall: 0.67<br>Precision: 0.82<br><br><b>Bone Lesion:</b><br>Mean DSC: 0.61<br>Global DSC: 0.61<br>Recall: 0.67<br>Precision: 0.88 | Not addressed | No |
| 9  | Papandrianos, N., E. Papageorgiou, and A. Anagnostis, 2020 | CNN                                                       | prostate                                     | Bone Scans | 778 whole-body scintigraphy images from 817 different male patients                  | Identify bone metastasis          | PA                         | PA: 91.42% ± 1.64%                                                                                                                                                                        | Not addressed | No |
| 10 | Song, Y., et al., 2019                                     | Modified Holistically nested Edge Detection, FCN          | Metastases /Not specified the primary cancer | CT         | 21 patients, 250 images                                                              | Segmentation of Bone Metastasis   | TPR<br>IoU                 | TPR: 79.8%<br>IoU: 69.2%                                                                                                                                                                  | Not addressed | No |
| 11 | Zhang, J., et al., 2021                                    | U-Net                                                     | Metastases /Not specified                    | Bone Scans | 128 original datasets; 2280 sheets of                                                | Segmentation of Bone Metastasis   | DSC<br>IoU<br>MAP          | DSC: 0.571<br>Mean IoU: 0.633<br>MAP: 0.761                                                                                                                                               | Not addressed | No |

|    |                                      |                                  |                                                             |            |                                                                                                                                                                                                      |                                                                              |                               |                                                                                      |               |                                                                                                                                       |
|----|--------------------------------------|----------------------------------|-------------------------------------------------------------|------------|------------------------------------------------------------------------------------------------------------------------------------------------------------------------------------------------------|------------------------------------------------------------------------------|-------------------------------|--------------------------------------------------------------------------------------|---------------|---------------------------------------------------------------------------------------------------------------------------------------|
|    |                                      |                                  | the<br>primary<br>cancer                                    |            | amplified data<br>volume                                                                                                                                                                             |                                                                              |                               |                                                                                      |               |                                                                                                                                       |
| 12 | Apiparakoon<br>, T., et al.,<br>2020 | FPN                              | Metastases<br>/Not<br>specified<br>the<br>primary<br>cancer | Bone Scans | 9824 patients;<br>Whole body<br>scans:<br>Training:680;<br>Validation:200;<br>Testing: 240<br><br>Lesion instance<br>segmentation:<br>chest images:<br>19,648;<br>labeled:1,088<br>unlabelled:18,560 | Segment<br>abnormal<br>hotspots and<br>classify bone<br>cancer<br>metastases | F1<br>precision<br>TPR<br>TNR | F1: 0.852<br>mean precision: 0.856<br>mean TPR: 0.657<br>TNR: 0.857                  | Not addressed | No                                                                                                                                    |
| 13 | Borrelli, P., et<br>al., 2022        | CNN                              | Lung                                                        | PET/CT     | 320 patients                                                                                                                                                                                         | Segment and<br>quantify tumor<br>burden                                      | CI<br>Hazard<br>Ratio         | CI: 95% 1.21–2.21<br>Hazard Ratio: 1.64                                              | Feasible      | No,<br>Available<br>upon request<br>from the<br>RECOMIA<br>platform<br>( <a href="https://recomia.org">https://<br/>recomia.org</a> ) |
| 14 | Chang, C.Y.,<br>et al., 2022         | CNN                              | Metastases<br>/Not<br>specified<br>the<br>primary<br>cancer | CT         | 242 CT scans; 600<br>images                                                                                                                                                                          | Detection and<br>Segmentation of<br>lesions                                  | DSC<br>TPR<br>TNR<br>PPV      | DSC: 0.83<br>TPR: Global = 95%,<br>local=92%<br>TNR: local = 87%<br>PPV: local = 97% | No            | No                                                                                                                                    |
| 15 | da Cruz, L.B.,<br>et al., 2022       | DeepLabv3+<br>2.5D, Dual<br>Path | Kidney                                                      | CT         | 300 CT scans;<br>KiTS19 dataset                                                                                                                                                                      | Tumor<br>Segmentation                                                        | PA<br>TPR<br>TNR<br>DSC       | PA: 99.71%<br>TPR: 84.24%<br>TNR: 99.82%<br>DSC: 85.17%                              | Not addressed | No                                                                                                                                    |

|    |                                   |                                  |          |        |                                                                                                                                          |                           |                                                           |                                                                                                                                                                              |               |    |
|----|-----------------------------------|----------------------------------|----------|--------|------------------------------------------------------------------------------------------------------------------------------------------|---------------------------|-----------------------------------------------------------|------------------------------------------------------------------------------------------------------------------------------------------------------------------------------|---------------|----|
|    |                                   | Network (DPN)                    |          |        |                                                                                                                                          |                           | Jl<br>HD<br>ASD                                           | Jl: 75.62%<br>HD: 18.39 mm<br>ASD: 3.36 mm                                                                                                                                   |               |    |
| 16 | Ding, Y., et al., 2022            | V-net                            | Cervical | CT     | 130 patients                                                                                                                             | CTV and OARs Segmentation | DSC<br>Jl<br>ASD<br>HD                                    | CTV<br>DSC: 0.85<br>Jl: 0.77<br>ASD: 2.58 mm<br>HD: 11.2 mm                                                                                                                  | Feasible      | No |
| 17 | Li, L., et al. 2020               | 3D FCN + fuzzy variational model | Lung     | PET/CT | 84 Patients; 48 randomly selected CT images were used to train the FCN, and the remaining 36 PET/CT images were used as the test dataset | Tumor Segmentation        | DSI<br>TPR<br>PPV<br>Volume error<br>Classification error | DSI: 0.86 ±0.05<br>TPR: 0.86 ±0.07<br>PPV: 0.87 ±0.10<br>volume error: of 0.16 ±0.12<br>classification error: 0.30 ±0.12                                                     | Not addressed | No |
| 18 | Lu, Y., et al., 2020              | U-Net                            | Lung     | PET    | 25 patients; 1309 PET images; before-radiotherapy (BR) sub-database (769 images); after-radiotherapy (AR) sub-database (540 images)      | Tumor segmentation        | DSC<br>TPR<br>HD<br>Jl<br>PPV                             | <b>BR:</b><br>DSC: (0.8615, 0.7635, 0.6607)<br>TPR: (0.8938, 0.7413, 0.7462)<br>PPV: (0.8990, 0.8050, 0.6223)<br><br><b>AR:</b><br>DSC: 0.8518<br>TPR: 0.8397<br>PPV: 0.8933 | Not Addressed | No |
| 19 | Protonotarios, N.E., et al., 2022 | U-Net                            | Lung     | PET/CT | 87 patients; Lung-PET-CTDx                                                                                                               | Tumor segmentation        | PA<br>Precision<br>Recall<br>F1                           | Average PA: 99.332<br>Average Precision: 76.206<br>Average Recall: 57.636<br>Average F1: 60.072                                                                              | No            | No |

|    |                          |     |                        |    |                                                                                                                                                         |                  |            |                                                                                                                                                                                                                                                                                                                                                                                                                                                                                                                                                                                                            |               |    |
|----|--------------------------|-----|------------------------|----|---------------------------------------------------------------------------------------------------------------------------------------------------------|------------------|------------|------------------------------------------------------------------------------------------------------------------------------------------------------------------------------------------------------------------------------------------------------------------------------------------------------------------------------------------------------------------------------------------------------------------------------------------------------------------------------------------------------------------------------------------------------------------------------------------------------------|---------------|----|
|    |                          |     |                        |    | open dataset from The Cancer Imaging Archive Database (TCIA); Used only patients who underwent a PET and CT examination with B70f reconstruction kernel |                  | IoU<br>AUC | Average IoU: 49.036                                                                                                                                                                                                                                                                                                                                                                                                                                                                                                                                                                                        |               |    |
| 20 | Sartor, H., et al., 2020 | CNN | Cervical and Anorectal | CT | 266 cases; Training/Validation: Cervical cancer:65; Anorectal cancer: 161;                                                                              | OAR Segmentation | MSD<br>DSC | <b>Anorectal cancer:</b><br>DSC: <ul style="list-style-type: none"> <li>– Femoral heads: 0.91–0.92</li> <li>– Bladder: 0.94</li> <li>– Bowel Bag: 0.83</li> </ul> MSD: <ul style="list-style-type: none"> <li>– Femoral heads: 1.93–1.86</li> <li>– Bladder: 2.07</li> <li>– Bowel Bag: 6.80</li> </ul> <b>Cervical cancer:</b><br>DSC: <ul style="list-style-type: none"> <li>– Femoral heads: 0.93–0.94</li> <li>– Bladder: 0.84</li> <li>– Bowel Bag: 0.88</li> <li>– CTVNs: 0.82</li> </ul> MSD: <ul style="list-style-type: none"> <li>– Femoral heads: 1.42–1.49</li> <li>– Bladder: 3.51</li> </ul> | Not Addressed | No |

|    |                         |                             |                                                                      |        |                                                                                                                                                                                                      |                       |                                                  |                                                                                            |               |    |
|----|-------------------------|-----------------------------|----------------------------------------------------------------------|--------|------------------------------------------------------------------------------------------------------------------------------------------------------------------------------------------------------|-----------------------|--------------------------------------------------|--------------------------------------------------------------------------------------------|---------------|----|
|    |                         |                             |                                                                      |        |                                                                                                                                                                                                      |                       |                                                  | <ul style="list-style-type: none"> <li>– Bowel Bag: 5.80</li> <li>– CTVNs: 3.89</li> </ul> |               |    |
| 21 | Tian, H., et al., 2020  | FCN                         | Lung                                                                 | PET    | 54 3D PET images; 49 training images and 5 testing images, and then cut them into 2D slices for training. Finally, there was a balanced training set, and the total nearly training number is 14,700 | Tumor Segmentation    | DSC<br>TPF<br>FPF<br>Precision                   | DSC: 79.63±7.99<br>TPF: 92.05±5.81<br>FPF: 0.02±0.01<br>Precision: 86.83±7.14              | Not Addressed | No |
| 22 | Zhang, Y., et al., 2022 | GAN                         | Abdomen, Soft tissue, Liver, Lung, Mediastinum, Bone, Pelvis, Kidney | CT     | 4427 patients; 10,954 CT scans                                                                                                                                                                       | Tumor Detection       | Mean Pixel Accuracy<br>Precision<br>Recall<br>JI | Mean Pixel Accuracy: 0.9841<br>Precision: 0.9737<br>Recall: 0.9845                         | Not Addressed | No |
| 23 | Zhao, X., et al., 2019  | Deep CNN                    | Lung                                                                 | PET/CT | 84 patients; Training: 84 PET/CT images; Testing: 36 PET/CT images                                                                                                                                   | Tumor Co-segmentation | DSC<br>CE<br>VE                                  | Mean and SD of;<br>DSC: 0.85 (0.08)<br>CE: 0.33 (0.19)<br>VE: 0.15 (0.14)                  | Not Addressed | No |
| 24 | Hu, Q., et al., 2020    | mask R-CNN/<br>K-means /SVM | Lung                                                                 | CT     | 13,000 CT images; 39 lung CT exams                                                                                                                                                                   | Lung segmentation     | Position Adjustment<br>Intensity Adjustment      | The Mask R-CNN and K-means configuration yielded the best values of Position Adjustment    | Not Addressed | No |

|    |                                  |                                |                           |        |                                                                                                                                                                      |                                               |                                                          |                                                                                                                                                                     |               |    |
|----|----------------------------------|--------------------------------|---------------------------|--------|----------------------------------------------------------------------------------------------------------------------------------------------------------------------|-----------------------------------------------|----------------------------------------------------------|---------------------------------------------------------------------------------------------------------------------------------------------------------------------|---------------|----|
|    |                                  |                                |                           |        |                                                                                                                                                                      |                                               | Size Adjustment<br>DSC<br>PA<br>TPR<br>Segmentation time | (99.21%), Intensity Adjustment (99.40%), Size Adjustment (97.62%), DSC (97.33%), PA (97.11%) and the second best in TPR (96.58%), after Mask R-CNN and SVM (96.69%) |               |    |
| 25 | Lindgren Belal, S., et al., 2019 | CNN                            | Prostate                  | PET/CT | 100 CT scans                                                                                                                                                         | Bone Segmentation                             | Sørensen-Dice index                                      | Sørensen-Dice index: 0.86 (Th7), 0.85 (L3), 0.88 (sacrum), 0.84 (7th rib) and 0.83 (sternum)                                                                        | No            | No |
| 26 | Noguchi, S., et al., 2020        | U-Net                          | Lung, Breast and other    | CT     | In-house dataset: 16 patients; 32 scans; 16218 slices<br>Secondary dataset: 20 patients; 20 scans; 12529 slices<br>Public dataset: 20 patients; 27 scans; 270 slices | Bone Segmentation                             | DSC                                                      | DSC:<br>In-house: $0.983 \pm 0.005$<br>Secondary: $0.943 \pm 0.007$<br>Public: $0.947 \pm 0.013$                                                                    | Not Addressed | No |
| 27 | Xiong, X., et al., 2022          | U-Net                          | Pelvic                    | PET/CT | 34 patients (17 female and 17 male); 34 planning CT scans and 106 FLT PET-CT scans                                                                                   | Pelvis segmentation and uptake quantification | DSC                                                      | Average DSC: $0.9396 \pm 0.0182$                                                                                                                                    | Not Addressed | No |
| 28 | Arends, S.R.S., et al., 2022     | CNN (two networks for combined | Metastases /Not specified | CT     | Training:                                                                                                                                                            | Vertebral body segmentation                   | DSC<br>HD                                                | DSC: 96.7%<br>HD: 3.6 mm                                                                                                                                            | Feasible      | No |



|    |                             |                                   |                    |    |                                                                                                                                                                                                                                                                                     |                                                                     |                  |                                                                                                                                                                                                                                                                                                                                                                                                                                                                                 |                                                                                   |    |
|----|-----------------------------|-----------------------------------|--------------------|----|-------------------------------------------------------------------------------------------------------------------------------------------------------------------------------------------------------------------------------------------------------------------------------------|---------------------------------------------------------------------|------------------|---------------------------------------------------------------------------------------------------------------------------------------------------------------------------------------------------------------------------------------------------------------------------------------------------------------------------------------------------------------------------------------------------------------------------------------------------------------------------------|-----------------------------------------------------------------------------------|----|
|    |                             | approach and sequential approach) | the primary cancer |    | 59 patients (31 female and 28 male); 580 Vertebrae Evaluation: VerSe 2019 dataset; 15 scans; 202 vertebrae                                                                                                                                                                          |                                                                     |                  | Most robust in external validation: sequential approach (DSC: 94.5% vs 94.4%, $p < 0.001$ , HD: 4.5 vs 7.1 mm, $p < 0.001$ )                                                                                                                                                                                                                                                                                                                                                    |                                                                                   |    |
| 29 | Feng, X., et al., 2020      | U-Net                             | Thoracic           | CT | Challenge dataset: 60 thoracic CT scans; Training :36; Offline Testing: 12; Online Testing: 12; Each group has 1:1:1 ratio from the three clinical sites Private Dataset: 45 randomly selected thoracic CT scans; Enhance Network Performance: 30 scans; Final Evaluation: 15 scans | OAR segmentation                                                    | DSC<br>MSD<br>HD | <b>DSC:</b><br>SpinalCord : $0.88 \pm 0.03$<br>Lung_R : $0.98 \pm 0.01$<br>Lung_L : $0.98 \pm 0.01$<br>Heart : $0.92 \pm 0.03$<br>Esophagus: $0.80 \pm 0.04$<br><br><b>MSD:</b><br>SpinalCord : $0.8 \pm 0.2$<br>Lung_R : $0.7 \pm 0.3$<br>Lung_L : $0.5 \pm 0.1$<br>Heart : $2.5 \pm 0.8$<br>Esophagus: $1.4 \pm 0.4$<br><br><b>HD:</b><br>SpinalCord : $0.8 \pm 0.2$<br>Lung_R : $0.7 \pm 0.3$<br>Lung_L : $0.5 \pm 0.1$<br>Heart : $2.5 \pm 0.8$<br>Esophagus: $1.4 \pm 0.4$ | Feasible to overcoming data heterogeneity in clinical practices with small effort | No |
| 30 | Ibragimov, B., et al., 2020 | CNN                               | Liver              | CT | 122 liver SBRT                                                                                                                                                                                                                                                                      | Identification of critical regions associated with toxicities after | PA               | PA: 73% in terms of the AUROCC. Significantly higher risk scores ( $P < 0.05$ ) of HB toxicity                                                                                                                                                                                                                                                                                                                                                                                  | Feasible                                                                          | No |

|    |                                          |                                                       |                  |    |                                                                                         |                                                 |           |                                                                                                                                                                                                                                                                                                                                                                   |                                                                                                   |    |
|----|------------------------------------------|-------------------------------------------------------|------------------|----|-----------------------------------------------------------------------------------------|-------------------------------------------------|-----------|-------------------------------------------------------------------------------------------------------------------------------------------------------------------------------------------------------------------------------------------------------------------------------------------------------------------------------------------------------------------|---------------------------------------------------------------------------------------------------|----|
|    |                                          |                                                       |                  |    |                                                                                         | liver stereotactic<br>body radiation<br>therapy |           | manifestation were<br>associated with irradiation<br>for<br>the hepatobiliary tract in<br>comparison to the risk<br>scores for liver segments I–<br>VIII and portal vein                                                                                                                                                                                          |                                                                                                   |    |
| 31 | Lin, X.W., N.<br>Li, and Q. Qi.,<br>2021 | U-Net with<br>Residual and<br>Attention<br>Mechanisms | Head and<br>Neck | CT | 50 CT images;<br>MICCAI 2019<br>StructSeg<br>challenge                                  | OAR<br>Segmentation                             | DSC<br>HD | Average DSC: 79.5%<br>Average HD: 6.99mm                                                                                                                                                                                                                                                                                                                          | Promising for<br>improving accuracy<br>and efficiency in<br>radiotherapy for<br>clinical doctors. | No |
| 32 | Liu, Z.K., et<br>al.,2020                | U-Net                                                 | Cervical         | CT | 105 patients;<br>average age $\pm$<br>standard<br>deviation: 51.81 $\pm$<br>10.14 years | OARs<br>segmentation                            | DSC<br>HD | <b>DSC:</b><br>bladder :0.924<br>bone marrow: 0.854<br>femoral head left: 0.906<br>femoral head right: 0.900<br>rectum: 0.791<br>small intestine: 0.833<br>spinal cord: 0.827<br><br><b>HD:</b><br>bladder: 5.098<br>bone marrow: 1.993<br>femoral head left: 1.390<br>femoral head right: 1.435<br>rectum: 5.949<br>small intestine: 5.281<br>spinal cord: 3.269 | Not Addressed                                                                                     | No |
| 33 | Nemoto, T.,<br>et al., 2020              | U-net                                                 | Lung             | CT | 232 NSCLC<br>cases; training<br>and validation:                                         | Normal lung<br>segmentation                     | DSC<br>CI | <b>DSC:</b><br>Smart segmentation: 0.964<br>[95% (CI), 0.960–0.968]                                                                                                                                                                                                                                                                                               | Need Further Study                                                                                | No |

|    |                                  |                  |                                                                                                                         |            |                                                                                                                                                                      |                                                                         |                                    |                                                                                                                                          |                                             |    |
|----|----------------------------------|------------------|-------------------------------------------------------------------------------------------------------------------------|------------|----------------------------------------------------------------------------------------------------------------------------------------------------------------------|-------------------------------------------------------------------------|------------------------------------|------------------------------------------------------------------------------------------------------------------------------------------|---------------------------------------------|----|
|    |                                  |                  |                                                                                                                         |            | 200; testing: 32 cases                                                                                                                                               |                                                                         | Wilcoxon signed-rank test (P<0.01) | 2D: 0.990 (95% CI, 0.989–0.992)<br>3D U-Net: 0.990 (95% CI, 0.989–0.991)                                                                 |                                             |    |
| 34 | Nemoto, T., et al., 2020         | U-Net            | prostate                                                                                                                | CT         | 556 cases; training and validation: 500; testing: 56                                                                                                                 | Semantic segmentation in radiation therapy planning for prostate cancer | DSC                                | <b>Highest DSC:</b><br>Prostate:0.85±0.05<br>bladder:0.94 ± 0.04<br>rectum: 0.85 ± 0.07                                                  | Not Addressed                               | No |
| 35 | Men, K., J. Dai, and Y. Li, 2017 | Deep Dilated CNN | Rectal                                                                                                                  | CT         | 278 patients; Training: 218 patients; Testing: 60 patients                                                                                                           | CTV and OAR Segmentation                                                | DSC                                | <b>DSC:</b><br>CTV: 87.7%<br>Bladder: 93.4%<br>Left femoral head: 92.1%<br>Right femoral head: 92.3%<br>Intestine: 65.3%<br>Colon: 61.8% | Not Addressed                               | No |
| 36 | Papandrianos, N., et al., 2020   | CNN              | breast                                                                                                                  | Bone Scans | 382 patients                                                                                                                                                         | Diagnosis of metastatic breast cancer in bones                          | PA                                 | PA: 92.50%.                                                                                                                              | Yes, Feasible                               | No |
| 37 | Pi, Y., et al., 2020             | CNN              | Lung, Pancreatic, Prostate, Thyroid cancer, Breast, Lymphoma, Colorectal, Ureteral carcinoma, Nasopharyngeal-carcinoma, | Bone Scans | 13,811 patients; 15,474 annotated examinations; 9595 benign diagnoses;5879 malignant cases; 6699 males (mean age 61.25 ±12.58); 7112 females (Mean age 54.43 ±11.58) | Segment abnormal hotspots and classify bone cancer metastases           | F1 Precision<br>TPR<br>TNR         | F1: 0.852<br>mean precision: 0.856<br>mean TPR: 0.657<br>TNR: 0.857                                                                      | Feasible for clinical bone scans diagnosis. | No |

|    |                       |                                                                                                 |                                                                                                                                                                                                                                                    |            |                                                                          |                                       |                         |                                                                                                                                                             |          |    |
|----|-----------------------|-------------------------------------------------------------------------------------------------|----------------------------------------------------------------------------------------------------------------------------------------------------------------------------------------------------------------------------------------------------|------------|--------------------------------------------------------------------------|---------------------------------------|-------------------------|-------------------------------------------------------------------------------------------------------------------------------------------------------------|----------|----|
|    |                       |                                                                                                 | Laryngeal carcinoma,<br>Liver,<br>Malignant melanoma<br>, Gastric,<br>Endometrial, Renal,<br>Biliary carcinoma,<br>Bladder,<br>Parotid carcinoma,<br>Esophageal carcinoma,<br>Ovarian carcinoma,<br>Mediastinal malignant tumor,<br>Uterine cervix |            |                                                                          |                                       |                         |                                                                                                                                                             |          |    |
| 38 | Liu, S., et al., 2022 | Deep residual CNN (bone scan classification model, a regional segmentation model, an assessment | Metastases /Not Specified the primary cancer                                                                                                                                                                                                       | Bone Scans | 280 patients with bone metastases; 341 patients with non-bone metastases | Automatically analyze bone metastases | PA<br>TPR<br>TNR<br>DSC | <b>Classification Model:</b><br>PA: 88.62%<br>TPR: 92.59%<br>TNR: 85.51%<br>DSC: 0.7387 (segmentation)<br><br><b>Report Generation Model:</b><br>PA: 78.05% | Feasible | No |

|    |                       |                                                                  |                                                                                                                                             |        |                                                                                                        |                                                                                                                           |                               |                                                                                         |                                                                                                                               |                                                                                                                                                                                                       |
|----|-----------------------|------------------------------------------------------------------|---------------------------------------------------------------------------------------------------------------------------------------------|--------|--------------------------------------------------------------------------------------------------------|---------------------------------------------------------------------------------------------------------------------------|-------------------------------|-----------------------------------------------------------------------------------------|-------------------------------------------------------------------------------------------------------------------------------|-------------------------------------------------------------------------------------------------------------------------------------------------------------------------------------------------------|
|    |                       | model for tumor burden and a diagnostic report generation model) |                                                                                                                                             |        |                                                                                                        |                                                                                                                           |                               |                                                                                         |                                                                                                                               |                                                                                                                                                                                                       |
| 39 | Lou, B., et al., 2019 | Multi-task deep NN                                               | Primary (stage IA–IV) or recurrent lung cancer and patients with other cancer types with solitary metastases or oligometastases to the lung | CT     | 944 patients; internal study cohort: 849 independent validation cohort :95                             | Generate an image fingerprint that predicts time-to-event treatment outcomes and approximates classical radiomic features | CI<br>C-index<br>Hazard Ratio | C-index: 0.77 (95% CI 0.69–0.92)<br>Hazard Ratio: 3.64 [95% CI 2.19–6.05],<br>p<0.0001) | Yes, pretreatment risk stratification and risk-adapted dose optimization in clinical trials and, in routine clinical practice | No                                                                                                                                                                                                    |
| 40 | Rao, C., et al., 2021 | U-Net                                                            | Oropharyngeal                                                                                                                               | PET/CT | 254 patients; Training: 180 patients; Validation: 21 patients; Testing: 53 patients; HECKTOR challenge | Tumor Segmentation                                                                                                        | DSC                           | <b>DSC:</b><br>Validation: 66.9%<br>Test set: 58.7%                                     | Not Addressed                                                                                                                 | Yes;<br><a href="https://gitlab.com/UM-CDS/projects/image-standardization-and-domain-adaptation/hecktor-">https://gitlab.com/UM-CDS/projects/image-standardization-and-domain-adaptation/hecktor-</a> |

|    |                                            |                              |                                                                          |            |                                                                                                    |                                                                                                                     |                                                                              |                                                                                                                                   |                                                |                                                                                     |
|----|--------------------------------------------|------------------------------|--------------------------------------------------------------------------|------------|----------------------------------------------------------------------------------------------------|---------------------------------------------------------------------------------------------------------------------|------------------------------------------------------------------------------|-----------------------------------------------------------------------------------------------------------------------------------|------------------------------------------------|-------------------------------------------------------------------------------------|
|    |                                            |                              |                                                                          |            |                                                                                                    |                                                                                                                     |                                                                              |                                                                                                                                   |                                                | segmentation-challenge                                                              |
| 41 | Xue, Z., et al., 2021                      | CNN                          | Liver                                                                    | PET/CT     | 100 scans                                                                                          | Tumor Segmentation                                                                                                  | DSC<br>HD                                                                    | Global DSC: $71.40 \pm 0.45$<br>HD: 48.0264 mm                                                                                    | Not Addressed                                  | No                                                                                  |
| 42 | Chen, J., et al., 2021                     | CNN                          | prostate                                                                 | SPECT/CT   | 12 patients; 11 clinical SPECT images; 12 clinical CT images; phantom data                         | Segmentation for partitioning a quantitative bone single-photon emission CT image into lesion, bone, and background | DSC<br>Recall<br>Precision<br>IoU                                            | <b>Clinical CT scan:</b><br>DSC: 0.794<br>Recall: 0.790<br>Precision: 0.804<br>IoU: 0.661                                         | Further evaluation needed with clinical images | No                                                                                  |
| 43 | Hsieh, T.-C., et al., 2021                 | CNN                          | Lung, Prostate, Breast, Liver, Nasopharyngeal-carcinoma and other cancer | Bone scans | 19,041 patients; Aged 22 to 92 years; 34386 images with metastases; 3041 images without metastases | Metastases Detection                                                                                                | PA<br>Precision<br>Recall<br>F1<br>AUROCC<br>NPV                             | PA: 0.961<br>Precision: 0.878<br>Recall: 0.599<br>F1: 0.712<br>AUROCC: 0.92<br>NPV: 0.965                                         | Not Addressed                                  | No                                                                                  |
| 44 | Biswas, B., S.K. Ghosh, and A. Ghosh, 2020 | Pulse-coupled neural network | Brain                                                                    | CT         | 250 CT images                                                                                      | Tumor Segmentation                                                                                                  | DSC<br>Ratio of Segmentation Error<br>Uniformity Measure<br>JI<br>PPV<br>TPR | Average of:<br>DSC: 32.687<br>Ratio of Segmentation Error: 7.87<br>Uniformity Measure: 0.99<br>JI: 0.96<br>PPV: 0.99<br>TPR: 0.99 | Not Addressed                                  | <a href="https://github.com/biswasjitcs/ecu">https://github.com/biswasjitcs/ecu</a> |

|              |                                            |                                                       |                             |                |                                                                             |                                             |                                    |                                                                                                                                                                                                                                                                                                      |               |                                                                                                                     |
|--------------|--------------------------------------------|-------------------------------------------------------|-----------------------------|----------------|-----------------------------------------------------------------------------|---------------------------------------------|------------------------------------|------------------------------------------------------------------------------------------------------------------------------------------------------------------------------------------------------------------------------------------------------------------------------------------------------|---------------|---------------------------------------------------------------------------------------------------------------------|
| 45           | Yousefirizi, F. and A. Rahmim, 2021        | GAN + Mumford-Shah loss functional                    | Head and Neck               | PET/CT         | 254 patients; Training: 201 patients; Testing: 53 patients; HECKTOR dataset | Tumor and nodal metastases Segmentation     | DSC Precision Recall               | DSC: 67% Precision: 73% Recall: 72%                                                                                                                                                                                                                                                                  | Not Addressed | No                                                                                                                  |
| Thresholding |                                            |                                                       |                             |                |                                                                             |                                             |                                    |                                                                                                                                                                                                                                                                                                      |               |                                                                                                                     |
| 1            | Hammes, J., P. Täger, and A. Drzezga, 2018 | Hounsfield unit threshold (HUT), SUV threshold (SUVT) | Prostate                    | PSMA PET/CT    | 20 68Ga-PSMA PET/CT scans                                                   | Automated Quantification of Bone Metastasis | correlation                        | SUVmax, $r^2 = 0.97$ ; SUVmean, $r^2 = 0.88$ ; lesion count, $r^2 = 0.97$                                                                                                                                                                                                                            | Not Addressed | Yes ( <a href="https://github.com/jochenhammes/PSMA_Analyses/">https://github.com/jochenhammes/PSMA_Analyses/</a> ) |
| 2            | Moussallem, M., et al., 2012               | Adaptive                                              | Lung                        | FDG PET/CT     | 65 lung lesions of 54 patients                                              | tumor segmentation                          | Mean difference Standard deviation | Lesions greater than 20 mm, (mean difference between measured and calculated data equal to $-0.8 \pm 9.0\%$ ) and an acceptable estimation of CT measurements. For lesions smaller than or equal to 20 mm, the method showed disagreement with the measurements derived from histological or CT data | Yes           | No                                                                                                                  |
| 3            | Perk, T., et al., 2018                     | a statistically optimized regional thresholding       | castrate resistant prostate | 18F-NaF PET/CT | 37 patients                                                                 | bone lesion detection                       | TPR TNR                            | TPR:95.8% TNR: 97.1%                                                                                                                                                                                                                                                                                 | Not Addressed | No                                                                                                                  |

|                           |                                                    |                                             |                  |            |                                                                               |                                                                      |                                                 |                                                                                  |               |    |
|---------------------------|----------------------------------------------------|---------------------------------------------|------------------|------------|-------------------------------------------------------------------------------|----------------------------------------------------------------------|-------------------------------------------------|----------------------------------------------------------------------------------|---------------|----|
| 4                         | Fränzle, A., et al., 2014                          | simple thresholding/flood filling algorithm | multiple myeloma | CT         | 14 CT scans                                                                   | bone segmentation                                                    | PA Centroid difference<br>Mean difference angle | PA: 90%<br>mean centroid difference: 21.7 mm<br>mean difference angle: 1.54°     | Not Addressed | No |
| 5                         | Nguyen, C.T., et al., 2016                         | Iterative                                   | Leukemia         | PET/CT     | 17 patients, 51 scans                                                         | 3D bone marrow segmentation                                          | PA                                              | an average PA of 91.7%<br>worst-case PA of 80.4%                                 | Not Addressed | No |
| 6                         | Tsujimoto, M., et al., 2018                        | Fixed                                       | Not specified    | SPECT/CT   | 35 patients; (17 males, 18 females); mean age was 61 ± 14 (range 30–80) years | segmentation and detection of increased uptake regions in Bone Scans | TPR<br>Correlation coefficient                  | TPR: 71%<br>Correlation coefficient 0.868                                        | Not Addressed | No |
| Clustering/Classification |                                                    |                                             |                  |            |                                                                               |                                                                      |                                                 |                                                                                  |               |    |
| 1                         | Chu, G., et al., 2014                              | Random Forest                               | prostate         | Bone Scans | 213 scans training set of 140 subjects and a testing set of 73 subjects       | Bone Tumor Segmentation                                              | JI                                              | JI: 0.57±0.27                                                                    | Not Addressed | No |
| 2                         | Elfarra, F.-G., M.A. Calin, and S.V. Parasca, 2019 | Parallelepiped Classification               | Not specified    | Bone Scans | 12 patients; mean age ± standard deviation: 61.08 ± 12.48 years               | Metastases Detection                                                 | classification accuracy<br>κ coefficient        | overall classification accuracy: 87.58 ± 2.25%<br>κ coefficient: 0.8367 ± 0.0252 | Not Addressed | No |
| 3                         | Hinzpeter, R., et al., 2022                        | Gradient-boosted tree                       | Prostate         | CT         | 67 patients; mean age 71 ± 7 years; range: 55–84 years                        | Invisible Bone Metastases Detection                                  | PA<br>CI<br>TPR<br>TNR                          | PA: 85%<br>CI: 0.76–0.92, p < .001<br>TPR: 78%<br>TNR: 93%                       | Not Addressed | No |
| 4                         | Slattery, A., 2017                                 | fuzzy clustering                            | Lymphoma         | PET-CT     | 248 patients                                                                  | delineate regions of interest within all phantoms                    | dSMAD<br>JI<br>HD<br>Δx                         | Mean dSMAD: 0.454<br>Mean JI: 0.979<br>Mean HD: 38.5<br>Mean Δx: 7               | Yes           | No |



|   |                                 |                           |                        |    |                                                                                                                                                                                              |                             |                                              |                                                                                                                                                                                                                                                                                                                                                                                    |               |    |
|---|---------------------------------|---------------------------|------------------------|----|----------------------------------------------------------------------------------------------------------------------------------------------------------------------------------------------|-----------------------------|----------------------------------------------|------------------------------------------------------------------------------------------------------------------------------------------------------------------------------------------------------------------------------------------------------------------------------------------------------------------------------------------------------------------------------------|---------------|----|
| 5 | Wiese, T., et al., 2011         | SVM                       | Breast, Lung, prostate | CT | 10 patients with sclerotic metastatic disease in the spine; 8 patients (80%) with prostate cancer, one patient (10%) with lung cancer, and one patient (10%) with breast cancer; 50-75 years | Cancer Metastasis Detection | TPR<br>CI                                    | TPR:77.4%<br>CI: (0.71, 0.84)                                                                                                                                                                                                                                                                                                                                                      | Not Addressed | No |
| 6 | AbuBaker, A. and Y. Ghadi, 2020 | Wavelet transform and SVM | Lung                   | CT | 60 CT images                                                                                                                                                                                 | Cancer Detection            | TPR<br>FPR                                   | TPR: 94.5%<br>FPR: 7 cluster/image                                                                                                                                                                                                                                                                                                                                                 | Not Addressed | No |
| 7 | Hussain, L., et al., 2019       | Naïve Bayes, DT and SVM   | Lung                   | CT | 76 patients; 954 images i.e., 568 from SCLC subjects and 377 from NSCLC subjects                                                                                                             | Cancer Detection            | TPR<br>TNR<br>PPV<br>NPV<br>TA<br>FPR<br>AUC | The highest detection accuracy was obtained with (TA=100%) with entropy, SIFT and texture features using Naïve Bayes, texture features using SVM Polynomial. Moreover, the highest separation was obtained using entropy, morphological, SIFT and texture features with (AUC=1.00) using Naïve Bayes classifier and texture features using Decision tree and SVM polynomial kernel | Not Addressed | No |

|    |                                                 |                                     |                           |               |                                                                             |                                                                                                                                                                            |                                            |                                                                                                                                                                                                                                                                                                           |               |    |
|----|-------------------------------------------------|-------------------------------------|---------------------------|---------------|-----------------------------------------------------------------------------|----------------------------------------------------------------------------------------------------------------------------------------------------------------------------|--------------------------------------------|-----------------------------------------------------------------------------------------------------------------------------------------------------------------------------------------------------------------------------------------------------------------------------------------------------------|---------------|----|
| 8  | Markel, D., et al., 2013                        | Decision Tree / K-nearest neighbors | Lung                      | 18-FDG PET/CT | 34 cases; both small cell and non-small cell lung carcinoma (stages T1–T4); | Segment GTV                                                                                                                                                                | TPR<br>DSC<br>TNR                          | TPR: 73.9%<br>DSC: 0.607<br>TNR: 99.2%                                                                                                                                                                                                                                                                    | Not addressed | No |
| 9  | Naquiuddin, M., et al., 2019                    | Fuzzy C-Mean (FCM)                  | Brain tumor               | CT            | 97 slices; 1 Male and 1 Female Patients aged 52 and 72 respectively         | Lesion demarcation to study the characteristics of brain tumor cases of CT scan image so that the information of grey level intensity and Hounsfield Units can be obtained | Gray Level Intensities<br>Hounsfield Units | <b>Gray Level Intensities:</b><br>Tumor: 64.5<br>Boundary (Lesion): 92<br>Skull: 254.5<br>Cerebrospinal fluid: 80.5<br>Gray Matter: 87.5<br>White Matter: 126<br><br><b>HU:</b><br>Tumor: 10<br>Boundary (Lesion): 47.5<br>Skull: 3000<br>Cerebrospinal fluid: 8.5<br>Gray Matter: 39<br>White Matter: 30 | Not addressed | No |
| 10 | Sarker, P., et al., 2017                        | K-means clustering                  | Lung                      | CT            | 70 patients; 22489 CT images                                                | Lung Tumor Segmentation and Classification                                                                                                                                 | PA<br>TPR<br>TNR                           | PA: 95.68%<br>TPR: 86.4%<br>TNR: 98%                                                                                                                                                                                                                                                                      | Not addressed | No |
| 11 | Polan, D.F., S.L. Brady, and R.A. Kaufman, 2016 | Random Forest algorithm             | neck–chest–abdomen–pelvis | CT            | 21 patient images sections, Additional 100 randomly selected patients       | Tissue Segmentation                                                                                                                                                        | DSC<br>TPR<br>TNR<br>PA                    | <b>For 21 patients:</b><br>DSC: $0.86 \pm 0.03$<br><b>For 100 patients:</b><br>TPR: 0.91 (range: 0.82–0.98),<br>TNR 0.89 (range: 0.70–0.98),<br>PA 0.90 (range: 0.76–0.98)                                                                                                                                | Not addressed | No |

|             |                              |                                              |                                              |           |                                                           |                                                     |                                                                                             |                                                                                                                                                                                                 |                                          |    |
|-------------|------------------------------|----------------------------------------------|----------------------------------------------|-----------|-----------------------------------------------------------|-----------------------------------------------------|---------------------------------------------------------------------------------------------|-------------------------------------------------------------------------------------------------------------------------------------------------------------------------------------------------|------------------------------------------|----|
| 12          | Zhou, H., et al., 2018       | SVM                                          | Lung                                         | CT        | 348 patients                                              | Diagnosis of Distant Metastasis                     | PA AUC                                                                                      | PA: 71.02%<br>AUC: 72.84%                                                                                                                                                                       | Not addressed                            | No |
| 13          | Zhang, J., et al., 2020      | SVM                                          | Lung                                         | PET/CT    | 82 patients                                               | Solitary Pulmonary Nodules Classification           | PA (95% CI)<br>TPR (95% CI)<br>TNR (95% CI)<br>PPV (95% CI)<br>NPV (95% CI)<br>AUC (95% CI) | PA (95% CI): 0.85 (0.838–0.862)<br>TPR (95% CI): 0.889 (0.684–1)<br>TNR (95% CI): 0.818 (0.59–1)<br>PPV (95% CI): 0.8 (0.552–1)<br>NPV (95% CI): 0.9 (0.714–1)<br>AUC (95% CI): 0.854 (0.637–1) | Not addressed                            | No |
| Statistical |                              |                                              |                                              |           |                                                           |                                                     |                                                                                             |                                                                                                                                                                                                 |                                          |    |
| 1           | Rachmawati, E., et al., 2020 | Active Shape Model                           | Metastases /Not specified the primary cancer | Bone Scan | 19 bone scan images, 200 landmark points in total         | Cancer Metastasis Detection                         | minimum cumulative error                                                                    | minimum cumulative error: 0.0446                                                                                                                                                                | Not addressed                            | No |
| 2           | Guo, Y., et al., 2014        | Fuzzy Markov Random Field Model              | Lung                                         | PET/CT    | 7 patients;                                               | Tumor Segmentation                                  | DSC                                                                                         | DSC: 0.85 ± 0.013                                                                                                                                                                               | Not Addressed                            | No |
| 3           | Martínez, F., et al., 2014   | Geometrical shape model                      | Pelvic                                       | CT        | 116 patients; Training: 30 patients; Testing: 86 patients | Organ Segmentation                                  | DSC                                                                                         | <b>DSC:</b><br>Prostate: 0.91<br>Bladder: 0.94<br>Rectum: 0.89                                                                                                                                  | Useful as a support in final delineation | No |
| 4           | Ninomiya, K., et al., 2018   | Bayesian delineation framework / anatomical- | Prostate                                     | CT        | 44 patients; median age: 72 year; range: 52-87            | Bayesian delineation framework of CTVs for prostate | Average location error<br>DSC                                                               | Average location errors of CTV PAs along the anterior-posterior and superior-                                                                                                                   | Yes                                      | No |

|                        |                               |                                                                 |                                              |            |                                                                                     |                                                                    |                            |                                                                                                                                                                                                                                                                                                                        |                                                     |    |
|------------------------|-------------------------------|-----------------------------------------------------------------|----------------------------------------------|------------|-------------------------------------------------------------------------------------|--------------------------------------------------------------------|----------------------------|------------------------------------------------------------------------------------------------------------------------------------------------------------------------------------------------------------------------------------------------------------------------------------------------------------------------|-----------------------------------------------------|----|
|                        |                               | features-based machine learning (AF-ML) / Probabilistic atlases |                                              |            | year; stage: T1-T4, N0, M0                                                          | to address the drawbacks of unknown CTV locations                  |                            | inferior directions without AF-ML were 5.7±4.6 mm and 5.5±4.3 mm, respectively, whereas the errors along the two directions with ANN, which showed the best performance, were 2.4±1.7 mm and 2.2±2.2 mm, respectively. The average DSC between reference and estimated CTVs for 44 test cases were 0.81±0.062 with ANN |                                                     |    |
| Atlas based approaches |                               |                                                                 |                                              |            |                                                                                     |                                                                    |                            |                                                                                                                                                                                                                                                                                                                        |                                                     |    |
| 1                      | Kim, N., et al., 2020         | Atlas-based automatic segmentation                              | Endometrial and Cervical                     | CT         | 75 patients                                                                         | Contouring in patients with endometrial and cervical cancers       | DSC<br>HD                  | best results / 60 patients: (DSC, 0.79; HD, 19.7 mm)<br>worst results/ 20 patients (DSC, 0.75; p = 0.012; HD, 21.3 mm; p = 0.002)                                                                                                                                                                                      | Yes                                                 | No |
| 2                      | Hanaoka, S., et al., 2017     | Landmark-guided diffeomorphic demons' algorithm                 | Bone disease                                 | CT         | 20 CT volumes in spine dataset and 50 whole torso CT datasets                       | Segmentation of the whole spine and pelvis in CT images            | mean distance error<br>DSC | mean distance error: 0.59 ± 0.14 mm<br>DSC: 0.90 ± 0.02                                                                                                                                                                                                                                                                | Not Addressed                                       | No |
| 3                      | Ruiz-España, S., et al., 2017 | Probabilistic atlas                                             | Metastases / Not specified the primary tumor | CT         | 21 patients; 11 male and 10 female (58.47 ± 13.78 years, mean ± standard deviation) | Segmentation of the Spine with a Special Focus on Ribs Suppression | DSC<br>HD<br>MSD           | HD: 15.51 ± 2.74 mm,<br>DSC: 91.01 ± 3.18 %<br>MSD: 0.66 ± 0.25 mm                                                                                                                                                                                                                                                     | Not Addressed                                       | No |
| 4                      | Yusufaly, T., et al., 2020    | Multi-atlas Approach                                            | Cervical                                     | FDG-PET/CT | 144 patients                                                                        | Active Bone Marrow Sparing                                         | DSC<br>CI                  | DSC: 0.73<br>CI: 95%                                                                                                                                                                                                                                                                                                   | Yes. Tested in multi-institutional trial, NRG-GY006 | No |

|                         |                               |                                                  |                                             |        |                                 |                                            |                                                                                                  |                                                                                                                                                                      |               |    |
|-------------------------|-------------------------------|--------------------------------------------------|---------------------------------------------|--------|---------------------------------|--------------------------------------------|--------------------------------------------------------------------------------------------------|----------------------------------------------------------------------------------------------------------------------------------------------------------------------|---------------|----|
|                         |                               |                                                  |                                             |        |                                 | Radiation Therapy                          |                                                                                                  |                                                                                                                                                                      |               |    |
| 5                       | Fritscher, K.D., et al., 2014 | Label fusion/ Multi atlas-based segmentation     | head and neck                               | CT     | 18 CT images                    | segmentation of head-neck CT               | DSC mean absolute distance max HD between the auto segmentation results and expert segmentations | <b>average DSC:</b><br>right parotid gland: 0.81<br>left parotid gland: 0.84<br>brainstem: 0.86                                                                      | Yes           | No |
| Region based approaches |                               |                                                  |                                             |        |                                 |                                            |                                                                                                  |                                                                                                                                                                      |               |    |
| 1                       | Yang, B., et al., 2018        | Multi-scale template matching and region growing | Lung                                        | PET/CT | 5 patients; 10 3D PET images    | Tumor segmentation                         | DSC<br>TPR<br>FPR                                                                                | DSC: 86.91±5.83%<br>TPR: 5.78±7.34%<br>FPR: 0.033±0.003%                                                                                                             | Not Addressed | No |
| 2                       | Dong, R., et al., 2017        | Connected component Labeled Graph Cuts Algorithm | Metastases /Not specified the primary tumor | CT     | 100 CT slices                   | Vertebral Segmentation                     | TPR<br>FPR                                                                                       | TPR: 96.72%<br>FPR: 1.84%                                                                                                                                            | Not Addressed | No |
| 3                       | Sato, S., et al., 2018        | salient region feature registration              | Metastases /Not specified the primary tumor | CT     | Synthetic data; No further info | Enhance the bone metastasis from CT images | TP<br>FP                                                                                         | rotating reference image at rotation angle theta alpha = -10 degrees:<br>TP 100.0 % and FP 12.16 %.<br>Gaussian filter to rotate image:<br>TP 70.40 % and FP 0.00 %. | Not Addressed | No |

|   |                           |                |      |    |                                            |                             |    |                                                                                                                                                     |               |    |
|---|---------------------------|----------------|------|----|--------------------------------------------|-----------------------------|----|-----------------------------------------------------------------------------------------------------------------------------------------------------|---------------|----|
|   |                           |                |      |    |                                            |                             |    | artificial pseudo lesion region to rotated image: TP 99.45 % and FP 17.89 %. adding random noise of 5% to rotated image: TP 83.05 % and FP 16.95 %. |               |    |
| 4 | Elsayed, O., et al., 2015 | Region Growing | Lung | CT | 200 patients; each with 150 to 500 images, | Pulmonary Nodules Detection | PA | PA: 98%                                                                                                                                             | Not Addressed | No |

Sensitivity: TPR; specificity: TNR; Area Under Curve: AUC; Youden’s Index: YI; False Positive: FP; Accuracy: PA; Class Pixel Accuracy: CPA; Intersection Over union: IOU; F1-score: F1; Dice Similarity Coefficient: DSC; Hausdorff Distance: HD; Jaccard Index: JI; Positive Predictive Value: PPV; Confidence Interval: CI; Mean Surface Distance: MSD; Dose Volumetric Histograms: DVH; True Positive Fraction: TPR; False positive Fraction: FPF; Classification Error: CE; Volume Error: VE; Mean Absolute error: MAE; Mean Error: ME; Mean Median 75% percentile 95% percentile 100% Percentile of symmetric mean absolute distance: dSMAD; Euler characteristic:  $\Delta\chi$ ; positive Predictive Value: PPV; Negative Predictive Value: NPV; Total Accuracy: TA; False Positive Rate: FPR; Similarity Index: SI; Average Surface Distance: ASD; average dice similarity indexes: DSI; area under the receiving operator characteristic Curve: AUROCC
